## **Robust de novo design of protein binding proteins from target structural information alone**

Longxing Cao<sup>1,2,#</sup>, Brian Coventry<sup>1,2,3,#</sup>, Inna Goreshnik<sup>1,2</sup>, Buwei Huang<sup>1,2,4</sup>, Joon Sung Park<sup>5</sup>, Kevin M. Jude<sup>6,7,8</sup>, Iva Marković<sup>9,10</sup>, Rameshwar U. Kadam<sup>11</sup>, Koen H.G. Verschueren<sup>9,10</sup>, Kenneth Verstraete<sup>9,10</sup>, Scott Thomas Russell Walsh<sup>12,13</sup>, Nathaniel Bennett<sup>1,2,3</sup>, Ashish Phal<sup>1,4,18</sup>, Aerin Yang<sup>6,7,8</sup>, Lisa Kozodoy<sup>1,2</sup>, Michelle DeWitt<sup>1,2</sup>, Lora Picton<sup>6,7,8</sup>, Lauren Miller<sup>1,2</sup>, Eva-Maria Strauch<sup>14</sup>, Samer Halabiya<sup>15</sup>, Bradley Hammerson<sup>16</sup>, Wei Yang<sup>1,2</sup>, Steffen Benard<sup>11</sup>, Lance Stewart<sup>1,2</sup>, Ian A. Wilson<sup>11,17</sup>, Hannele Ruohola-Baker<sup>1,18</sup>, Joseph Schlessinger<sup>5</sup>, Sangwon Lee<sup>5</sup>, Savvas N. Savvides<sup>9,10</sup>, K. Christopher Garcia<sup>6,7,8</sup>, David Baker<sup>1,2,19\*</sup>

1. Department of Biochemistry, University of Washington, Seattle, WA 98195, USA.

2. Institute for Protein Design, University of Washington, Seattle, WA 98195, USA.

3. Molecular Engineering Graduate Program, University of Washington, Seattle, WA 98195, USA.

4. Department of Bioengineering, University of Washington, Seattle, WA, 98195, USA.

5. Department of Pharmacology, Yale University School of Medicine, New Haven, CT 06520, USA.

6. Howard Hughes Medical Institute, Stanford University School of Medicine, Stanford, CA 94305, USA.

7. Department of Structural Biology, Stanford University School of Medicine, Stanford, CA 94305, USA.

8. Department of Molecular and Cellular Physiology, Stanford University School of Medicine, Stanford, CA 94305, USA.

9. VIB-UGent Center for Inflammation Research, 9052 Ghent, Belgium

10. Unit for Structural Biology, Department of Biochemistry and Microbiology, Ghent University, 9052 Ghent, Belgium.

11. Department of Integrative Structural and Computational Biology, The Scripps Research Institute, La Jolla, CA 92037, USA.

12. National Cancer Institute, National Institutes of Health, Chemical Biology Laboratory, 1050 Boyles Street, Building 376, Frederick, MD 21702

13. Present address: J.A.M.E.S. Farm, 13615 Highland Road, Clarksville, MD 21029, USA

14. Dept. of Pharmaceutical and Biomedical Sciences, University of Georgia, Athens, GA 30602, USA

15. Department of Electrical and Computer Engineering, University of Washington, Seattle, WA 98195, United States.

16. Seattle Structural Genomics Center for Infectious Disease, Seattle, WA 98109, USA.

40 17. The Skaggs Institute for Chemical Biology, The Scripps Research Institute, La Jolla,  
41 CA 92037, USA.  
42 18. Institute for Stem Cell and Regenerative Medicine, University of Washington, Seattle,  
43 WA 98109, USA  
44 19. Howard Hughes Medical Institute, University of Washington, Seattle, WA 98195, USA  
45 #These authors contributed equally  
46 \*Corresponding author. E-mail: [dabaker@uw.edu](mailto:dabaker@uw.edu)  
47  
48  
49

## 50 **Abstract**

51 The design of proteins that bind to a specific site on the surface of a target  
52 protein using no information other than the three-dimensional structure of the target  
53 remains an outstanding challenge. We describe a general solution to this problem  
54 which starts with a broad exploration of the very large space of possible binding modes  
55 and interactions, and then intensifies the search in the most promising regions. We  
56 demonstrate its very broad applicability by de novo design of binding proteins to 12  
57 diverse protein targets with very different shapes and surface properties. Biophysical  
58 characterization shows that the binders, which are all smaller than 65 amino acids, are  
59 hyperstable and bind their targets with nanomolar to picomolar affinities. We succeeded  
60 in solving crystal structures of four of the binder-target complexes, and all four are very  
61 close to the corresponding computational design models. Experimental data on nearly  
62 half a million computational designs and hundreds of thousands of point mutants  
63 provide detailed feedback on the strengths and limitations of the method and of our  
64 current understanding of protein-protein interactions, and should guide improvement of  
65 both. Our approach now enables targeted design of binders to sites of interest on a  
66 wide variety of proteins for therapeutic and diagnostic applications.

## 67 **Introduction**

68 Protein interactions play critical roles in biology, and general approaches to  
69 disrupt or modulate these with designed proteins would have huge impact. While  
70 empirical laboratory selection approaches starting from very large antibody, DARPIN or  
71 other protein scaffold libraries can generate binders to protein targets, it is difficult at the  
72 outset to target a specific region on a target protein surface, and to sample the full  
73 space of possible binding modes. Computational methods can target specific target  
74 surface locations and provide a more principled and potentially much faster approach to  
75 binder generation than random library selection methods, as well as insight into the  
76 fundamental properties of protein interfaces (which must be understood for design to be  
77 successful). Most current methods for computationally designing proteins to bind to a  
78 target surface utilize information derived from native complex structures on specific  
79 sidechain interactions or protein backbone placements optimal for binding<sup>1-3</sup>.  
80 Computational docking of antibody scaffolds with varied loop geometries has yielded  
81 binders, but the designed binding modes have rarely been validated with high-resolution  
82 structures<sup>4</sup>. Binders have been generated starting from several computationally  
83 identified hot-spot residues, which were then used to guide the positioning of naturally  
84 occurring protein scaffolds<sup>5</sup>. However, for many target proteins, there are no obvious  
85 pockets or clefts on the protein surface into which a small number of privileged  
86 sidechains can be placed, and guidance by only a small number of hotspot residues  
87 limits the approach to a small fraction of possible interaction modes.

## 88 **Design Method**

89           We sought to develop a general approach to design of high affinity binders to  
90 arbitrary protein targets that addresses two major challenges. First, in the general case,  
91 there are no clear sidechain interactions or secondary structure packing arrangements  
92 that can mediate strong interactions with the target; instead there are a very large  
93 number of individually very weak possible interactions. Second, the number of ways of  
94 choosing from these numerous weak interactions to incorporate into a single binding  
95 protein is combinatorially large, and any given protein backbone is unlikely to be able to  
96 simultaneously present sidechains that can encompass any preselected subset of these  
97 interactions. To motivate our approach, consider the simple analogy of a very difficult  
98 climbing wall with only a few good footholds or handholds distant from each other.  
99 Previous “hotspot” based approaches correspond to focusing on routes involving these  
100 footholds/handholds, but this greatly limits the possibilities and there may be no way to  
101 connect them into a successful route. An alternative is to first, identify all possible  
102 handholds and footholds, no matter how poor, second, have thousands of climbers  
103 select subsets of these, and try to climb the wall, third, identify those routes that were  
104 most promising, and fourth, have a second group of climbers explore them in detail.  
105 Following this analogy, we devised a multi-step approach to overcome the above two  
106 challenges by 1) enumerating a large and comprehensive set of disembodied sidechain  
107 interactions with the target surface, 2) identifying from large in silico libraries of protein  
108 backbones those that can host many of these sidechains without clashing with the  
109 target, 3) identifying recurrent backbone motifs in these structures, and 4) generating  
110 and placing against the target a second round of scaffolds containing these interacting

111 motifs (**Fig. 1a**). Steps 1 and 2 search the space very widely, while steps 3 and 4  
112 intensify search in the most promising regions. We describe and motivate each step in  
113 the following paragraphs.

114  
115 We began by docking disembodied amino acids against the target protein, and  
116 storing the backbone coordinates and target binding energies of the typically billions of  
117 amino acids making favorable hydrogen bonding or non-polar interactions in a 6-  
118 dimensional spatial hash table for rapid lookup (**Fig. 1a**; see methods). This “rotamer  
119 interaction field” (RIF) enables rapid approximation of the target interaction energy  
120 achievable by a protein scaffold docked against a target based on its backbone  
121 coordinates alone (with no need for time consuming sidechain sampling)--for each dock,  
122 the target interaction energies of each of the matching amino acids in the hash table are  
123 summed. A related approach was used for small molecule binder design<sup>6</sup>; since protein  
124 targets are so much bigger, and non-polar interactions are the primary driving force for  
125 protein-protein association, we focused the RIF generation process on non-polar sites in  
126 specific surface regions of interest: for example in the case of inhibitor design,  
127 interaction sites with biological partners. The RIF approach improves upon previous  
128 discrete interaction-sampling approaches<sup>5</sup> by reducing algorithmic complexity from  $O(N)$   
129 or  $O(N^2)$  to  $O(1)$  with respect to the number of sidechain-target interactions considered,  
130 allowing for billions, rather than thousands, of potential interfaces to be considered.

131  
132 For docking against the rotamer interaction field, it is desirable to have a very  
133 large set of protein scaffold options, as the chance that any one scaffold can house

134 many interactions is small. The structure models of these scaffolds must be quite  
135 accurate so that the positioning is correct. Using fragment assembly<sup>7</sup>, piecewise  
136 fragment assembly<sup>8</sup>, and helical extension<sup>9</sup>, we designed a large set of miniproteins  
137 ranging in length from 50 to 65 amino acids containing larger hydrophobic cores than  
138 previous miniprotein scaffold libraries<sup>1</sup>, which makes the protein more stable and more  
139 tolerant to introduction of the designed binding surfaces. 84,690 scaffolds spanning 5  
140 different topologies with structural metrics predictive of folding were encoded in large  
141 oligonucleotide arrays and 34,507 were found to be stable using a high-throughput  
142 proteolysis based protein stability assay<sup>10</sup>.

143

144 We experimented with several approaches for docking these stable scaffolds  
145 against the target structure rotamer interaction field, balancing overall shape  
146 complementarity with maximizing specific rotamer interactions. The most robust results  
147 were obtained using direct low resolution shape matching<sup>11</sup> followed by grid based  
148 refinement of the rigid body orientation in the RIF (RIFDock). This resulted in better  
149 Rosetta binding energies (ddGs) and packing (contact molecular surface, see below)  
150 after sequence design than shape matching alone with PatchDock (**Fig. 1b red and**  
151 **green**), and more extensive non polar interaction with the target than hierarchical  
152 search without PatchDock shape matching <sup>6</sup> (**Extended Data Fig. 1**).

153

154 Because of the loss in resolution in the hashing used to build the RIF, and the  
155 necessarily approximate accounting for interactions between sidechains (see methods),  
156 we found that evaluation of the RIF solutions is considerably enhanced by full

157 combinatorial optimization using the Rosetta forcefield, allowing the target sidechains to  
158 repack and the scaffold backbone to relax. Full combinatorial sequence optimization is  
159 quite CPU intensive, however, and to enable rapid screening through millions of  
160 alternative backbone placements, we developed a rapid pre-screening method using  
161 Rosetta to identify promising RIF docks. We found that including only hydrophobic  
162 amino acids, using a reduced set of rotamers than in standard Rosetta design  
163 calculations, and a more rapidly computable energy function sped design more than 10-  
164 fold while retaining a strong correlation with results after full sequence design (next  
165 paragraph); this pre-screen (referred to as the “Predictor” below) substantially improved  
166 the binding energies and shape complementarity of the final designs as far more RIF  
167 solutions could be processed (**Extended Data Fig. 2**).

168  
169 We observed that application of standard Rosetta design to the set of filtered  
170 docks in some cases resulted in models with buried unsatisfied polar groups and other  
171 suboptimal properties. To overcome these limitations, we developed a combinatorial  
172 sequence design protocol that maximizes shape and chemical complementarity with the  
173 target while avoiding buried polar atoms. Sequence compatibility with the scaffold  
174 monomer structure was increased using a structure based sequence profile<sup>12</sup>, the  
175 cross-interface interactions were upweighted during the Monte Carlo-based sequence  
176 design stage to maximize the contacts between the binder and the target  
177 (ProteinProteinInterfaceUpweighter; see Methods), and rotamers containing buried  
178 unsatisfiable polar atoms were eliminated prior to packing and buried unsatisfied polar  
179 atoms penalized by a pair-wise decomposable pseudo-energy term<sup>13</sup>. This protocol

180 yielded amino acid sequences more strongly predicted to fold to the designed structure  
181 (**Extended Data Fig. 3a**) and to bind the target (**Extended Data Fig. 3b**) than standard  
182 Rosetta interface design.

183

184 In the course of developing the overall binder design pipeline, we noticed upon  
185 inspection that even designs with favorable Rosetta binding free energies, large  
186 changes in Solvent Accessible Surface Area (SASA) upon binding, and high shape  
187 complementarity (SC) often lacked dense packing and interactions involving several  
188 secondary structural elements. We developed a quantitative measure of packing quality  
189 in closer accord with visual assessment -- the contact molecular surface (see methods)  
190 -- which balances interface complementarity and size in a manner that explicitly  
191 penalizes poor packing. We used this metric to help select designs at both the rapid  
192 Predictor stage and after full sequence optimization (see Methods).

193

194 The space sampled by the search over structure and sequence space is  
195 enormous: tens of thousands of possible protein backbones × nearly one billion possible  
196 disembodied sidechain interactions per target ×  $10^{16}$  interface sequences per scaffold  
197 placement. Sampling of spaces of this size is necessarily incomplete, and many of the  
198 designs at this stage contained buried unsatisfied polar atoms (only rotamers that  
199 cannot make hydrogen bonds in any context are excluded at the packing stage) and  
200 cavities. To generate improved designs, we intensified the search around the best of the  
201 designed interfaces. We developed a resampling protocol which extracts all the  
202 secondary structural motifs making good contacts with the target protein from the first



203 “broad search” designs, clusters these motifs based on their backbone coordinates and  
204 rigid body placements, and then selects the binding motif in each cluster with the best  
205 per-position weighted Rosetta binding energy; around 2,000 motifs were selected for  
206 each target. These motifs, which are privileged because they contain a much greater  
207 density of favorable side chain interactions with the target than the rest of the designs,  
208 were then used to guide another round of docking and design. Scaffolds from the  
209 library were superimposed on the privileged motifs, the favorable-interacting motif  
210 residues transferred to the scaffold, and the remainder of the scaffold sequence  
211 optimized to make further interactions with the target, allowing backbone flexibility to  
212 increase shape complementarity with the target (**Fig. 1a**). Interface metrics for the  
213 designs based on the resampling protocol were considerably improved relative to those  
214 of the designs from the broad searching stage (**Fig. 1b**). The designs with the most  
215 favorable protein folding and protein interface metrics from both the broad searching  
216 and resampling stages were selected for experimental validation.

## 217 **Experimental testing**

218 Previous protein binder design approaches have been tested on only one or two  
219 targets, which limits assessment of their generality. To robustly test our new binder  
220 design pipeline, we selected thirteen native proteins of considerable current interest  
221 spanning a wide range of shapes and biological functions. These proteins fall into two  
222 classes: first, human cell surface or extracellular proteins involved in signaling, for  
223 which binders could have utility as probes of biological mechanism and potentially as  
224 therapeutics (Tropomyosin receptor kinase A (TrkA)<sup>14</sup>, Fibroblast growth factor receptor  
225 2 (FGFR2)<sup>15</sup>, Epidermal growth factor receptor (EGFR)<sup>16</sup>, Platelet-derived growth factor

226 receptor (PDGFR)<sup>17</sup>, Insulin receptor (InsulinR)<sup>18</sup>, Insulin-like growth factor 1 receptor  
227 (IGF1R)<sup>19</sup>, Angiotensin-1 receptor (Tie2)<sup>20</sup>, Interleukin-7 receptor alpha (IL-7R $\alpha$ )<sup>21</sup>, CD3  
228 delta chain (CD3 $\delta$ )<sup>22</sup>, Transforming growth factor beta (TGF- $\beta$ )<sup>23</sup>; and second,  
229 pathogen surface proteins for which binding proteins could have therapeutic utility  
230 (Influenza A H3 hemagglutinin (H3)<sup>24</sup>, VirB8-like protein from *Rickettsia typhi* (VirB8)<sup>25</sup>,  
231 and the SARS-CoV-2 coronavirus spike protein) (**Fig. 2a**). For each target, we  
232 selected one or two regions to direct binders against for maximal biological utility and for  
233 potential downstream therapeutic potential. These regions span a wide range of  
234 surface properties, with diverse shape and chemical characteristics (**Fig. 2a and**  
235 **Extended Data Fig. 4**).

236

237 Using the above protocol, we designed 15,000-100,000 binders for each of  
238 thirteen target sites on the twelve native proteins (see Methods; we chose two sites on  
239 the EGF receptor). Synthetic oligonucleotides (230bp) encoding the 50-65 residue  
240 designs were cloned into a yeast surface expression vector, the designs were displayed  
241 on the surface of yeast, and those which bind their target enriched by several rounds of  
242 fluorescence-activated cell sorting using fluorescently labelled target proteins. The  
243 starting and enriched populations were deep sequenced, and the fraction of each  
244 design after each sort was determined by comparing the frequency of the design in the  
245 parent and child pools. From multiple sorts at different target protein concentrations, we  
246 determined, as a proxy for binding K<sub>d</sub>'s, the midpoint concentration (SC<sub>50</sub>) in the binding  
247 transitions for each design in the library (**Extended Data Table 1 and Supplementary**  
248 **Methods**).

249

250 To assess whether the top enriched designs for each target fold and bind as in  
251 the corresponding computational design models, and to investigate the sequence  
252 dependence of folding and binding, we generated high resolution footprints of the  
253 binding surface by sorting site saturation mutagenesis libraries (SSMs) in which every  
254 residue was substituted with each of the 20 amino acids one at a time. For the majority,  
255 but not all, enriched designs, substitutions at the binding interface and in the protein  
256 core were less tolerated than substitutions at non-interface surface positions (**Fig. 2b**,  
257 **Extended Data Fig. 20 & Extended Data Fig. 5**), and all the cysteines were highly  
258 conserved in designs containing disulfides. The effects of each mutation on both binding  
259 energy and monomer stability were estimated using Rosetta design calculations, and a  
260 reasonable correlation was found between the predicted and experimentally determined  
261 effect of mutations (**Extended Data Fig. 6**). In almost all cases, a small number of  
262 substitutions were found to increase apparent binding affinity, and we generated  
263 libraries combining 5-15 of these and sorted for binding under increasingly stringent  
264 (lower target concentrations) conditions. Many of these affinity-enhancing substitutions  
265 were mutations to tyrosine (**Extended Data Fig. 7**), consistent with the high relative  
266 frequency of tyrosine in natural protein interfaces<sup>26</sup>. The set of affinity increasing  
267 substitutions provide valuable information for improving the approach as these  
268 substitutions ideally would have been identified in the computational sequence design  
269 calculations (see discussion below).

270

271 We expressed the highest affinity combinatorially-optimized binders for each  
272 target in *E.coli* for more detailed structural and functional characterization. All of the  
273 designs were in the soluble fraction, and could be readily purified by nickel-NTA  
274 chromatography. All had circular dichroism spectra consistent with the design model,  
275 and most (9 out of 13) were stable at 95 °C (**Fig. 2d**). The binding affinities for the  
276 targets were assessed by biolayer interferometry, and found to range from 300 pM to  
277 900 nM (**Fig. 2c and Extended Data Table 2**). The sequence mapping data report on  
278 the residues on the design critical for binding, but only weakly on the region of the target  
279 bound. We investigated this using a combination of binding competition experiments,  
280 biological assays, and structural characterization of the complexes. For the nine targets  
281 for which these were available, this characterization suggested binding modes  
282 consistent with the design models, as described in the following paragraphs.

### 283 **Host protein targets involved in signaling**

284 The receptor tyrosine kinases TrkA, FGFR2, PDGFR, EGFR, InsulinR, IGF1R  
285 and Tie2 are key regulators of cellular processes and are involved in the development  
286 and progression of many types of cancer<sup>27</sup>. We designed binders targeting the native  
287 ligand binding sites for PDGFR, EGFR (on both domain I and domain III, the binders are  
288 referred to as EGFRn\_mb and EGFRc\_mb respectively), InsulinR, IGF1R and Tie2, and  
289 targeting surface regions proximal to the native ligand binding sites for TrkA and FGFR2  
290 (**Fig. 2a** and see methods for criteria). We obtained binders to all eight target sites; the  
291 binding affinities of the optimized designs ranged from ~1nM or better for TrkA and  
292 FGFR2, to 860nM for IGF1R. Competition experiments with nerve growth factor (NGF),  
293 Platelet Derived Growth Factor-BB (PDGF-BB), insulin, insulin growth factor-1 (IGF-1)

294 and Angiopoietin 1 (Ang1) on yeast suggest that the binders for TrkA, PDGFR, InsulinR,  
295 IGF1R and Tie2 bind to the targeted sites (**Extended Data Fig. 8**), consistent with the  
296 computational design models. The receptor tyrosine kinase binders as monomers are  
297 all expected to be antagonists, and we tested the effect on signaling through TrkA,  
298 FGFR2 and EGFR of the cognate binders on cells in culture. Strong inhibition of  
299 signaling by the native agonists was observed in all three cases (**Fig. 3a-c, Extended**  
300 **Data Fig. 9 and Extended Data Fig. 10**).

301  
302 Binding of IL-7 to the IL-7 $\alpha$  receptor subunit leads to recruitment of the  $\gamma_c$   
303 receptor, forming a tripartite cytokine-receptor complex crucial to several signaling  
304 cascades leading to the development and homeostasis of T and B cells<sup>28</sup>. We obtained  
305 a picomolar affinity binder for IL-7R $\alpha$  targeting the IL-7 binding site, and found that it  
306 blocks STAT5 signaling induced by IL-7 (**Fig. 3d**). We also obtained binders to CD3 $\delta$ ,  
307 one of the subunits of the T-cell receptor, and the signaling molecule TGF- $\beta$ , which play  
308 critical roles in immune cell development and activation (**Fig. 2**).

### 309 **Pathogen target proteins**

310 Hemagglutinin (HA) is the main target for influenza A virus vaccine and drug  
311 development, and it can be genetically classified into two main subgroups, group 1 and  
312 group 2<sup>29,30</sup>. The HA stem region is an attractive therapeutic epitope, as it is highly  
313 conserved across all the influenza A subtypes and targeting this region can block the  
314 low pH-induced conformational rearrangements associated with membrane fusion,  
315 which is essential for virus infection<sup>31,32</sup>. Neutralizing antibodies targeting the stem  
316 region of group 2 HA have been identified through screening of large B-cell libraries

317 after vaccination or infection that neutralize both group 1 and group 2 influenza A  
318 viruses<sup>33,34</sup>. Protein<sup>1,5</sup>, peptide<sup>35</sup> and small molecule inhibitors<sup>36</sup> have been designed to  
319 bind to the stem region of group 1 HA and neutralize the influenza A viruses, but none  
320 recognize the group 2 HA. However, the design of small proteins or peptides that can  
321 bind and neutralize both group 1 HA and group 2 HA has been challenging due to three  
322 differences between the group 1 HA and the group 2 HA: first, the group 2 HA stem  
323 region is more hydrophilic, containing more polar residues, second, in group 2 HA,  
324 Trp21 adopts a configuration roughly perpendicular to the surface of the targeting  
325 groove, which makes the targeted groove much shallower and less hydrophobic, and  
326 third, the group 2 HA is glycosylated at Asn38 with the carbohydrate side chains  
327 covering the hydrophobic groove (**Extended Data Fig. 11**). We used our new method to  
328 design binders to H3 HA (A/Hong Kong/1/1968), the main pandemic subtype of group 2  
329 influenza virus, and obtained a binder with an affinity of 320 nM to the wild type H3 (**Fig**  
330 **2**) and 28nM to the deglycosylated H3 variant (N38D) (**Extended Data Fig. 12a**); the  
331 reduction in affinity is likely due to the entropy loss of the glycan upon binding and/or the  
332 steric clash with the glycan. The binder also binds to H1 HA (A/Puerto Rico/8/1934)  
333 which belongs to the main pandemic subtype of group 1 influenza virus (**Extended Data**  
334 **Fig. 12b**); the binding with both H1 and H3 is competed by the stem region binding  
335 neutralizing antibody FI6v3<sup>33</sup> on the yeast surface (**Extended Data Fig. 12c,d**),  
336 suggesting that the binder binds the hemagglutinin at the targeted site. We also  
337 designed binders to the prokaryotic pathogen protein VirB8 which belongs to the type IV  
338 secretion system of *Rickettsia typhi*, which is the causative agent of murine typhus<sup>25</sup>.

339 We selected the surface region composed of the second and the third helices of VirB8,  
340 and obtained binders with 500 pM affinity (**Fig. 2**).

341

342 With the outbreak of the SARS-CoV-2 coronavirus pandemic we applied our  
343 method to design miniproteins targeting the receptor binding domain of the SARS-CoV-  
344 2 Spike protein near the ACE2 binding site to block receptor engagement. Due to the  
345 pressing need for coronavirus therapeutics, we recently described the results of these  
346 efforts<sup>37</sup> ahead of those described in this manuscript; As in the case of FGFR2, IL-7R $\alpha$   
347 and VirB8, the method yielded picomolar binders, which are among the most potent  
348 compounds known to inhibit the virus in cell culture (IC<sub>50</sub> 0.15ng/ml) and subsequent  
349 animal experiments have shown that they provide potent protection against the virus in  
350 vivo<sup>38</sup>. The modular nature of the miniprotein binders enables their rapid integration into  
351 designed diagnostic biosensors for both influenza and SARS-CoV-2 binders<sup>39</sup>.

352

353 The designed binding proteins are all very small proteins (<65 amino acids), and  
354 many are 3-helix bundles. To evaluate their target specificity, we tested the highest  
355 affinity binder to each target for binding to all other targets. There was very little cross  
356 reactivity (**Fig. 4a**), likely due to their quite diverse surface shapes and electrostatic  
357 properties (**Fig. 4b**). Consistent with previous observations with affibodies<sup>40</sup>, this  
358 suggests that a wide variety of binding specificities can be encoded in simple helical  
359 bundles; in our approach, scaffolds are customized for each target, so the specificity  
360 arises both from the set of sidechains at the binding interface, and the overall shape of  
361 the interface itself.

## 362 High-resolution structural validation

363 High resolution structures are critical for evaluating the accuracy of  
364 computational protein designs. We succeeded in obtaining crystal structures of the  
365 unbound miniprotein binders for FGFR2 and IL-7R $\alpha$ , as well as the co-crystal structures  
366 of the miniprotein binders of H3, TrkA, FGFR2 and IL-7R $\alpha$  in complex with their targets  
367 (**Extended Data Table 3**). The H3 binder binds to the shallow groove of the stem region  
368 of HK68/H3 HA in the crystal structure as designed; the C $\alpha$  root-mean-square deviation  
369 (rmsd) over the entire miniprotein binder is 1.42 Å using the HA as the alignment  
370 reference (**Fig. 5a and Extended Data Fig. 13**). The binder makes extensive  
371 hydrophobic interactions with HA and almost all of the designed interface side chain  
372 configurations are recapitulated in the crystal structure (**Fig. 5a**). There is a clear  
373 reorientation of the oligosaccharide at Asn38 compared with the unbound HK68/H3  
374 structure (**Fig. 5a and Extended Data Fig. 11**; this has been observed in HK68/H3  
375 structures bound with stem region neutralizing antibodies<sup>33,34</sup>), consistent with the  
376 higher binding affinity for a deglycosylated variant (N38D) than for wild type H3 HA  
377 (A/Hong Kong/1/1968) in BLI assays (**Fig. 2 and Extended Data Fig. 12**). The crystal  
378 structure of the TrkA binder in complex with TrkA was very close to the design model  
379 (**Fig. 5b**). After aligning the crystal structure and design model on TrkA, the C $\alpha$  rmsd  
380 over the entire miniprotein binder is 2.41 Å, and over the two interfacial binding helices  
381 1.20 Å. The crystal structures of the FGFR2 binder by itself (**Extended Data Fig. 14a**)  
382 and in complex with the third Ig-like domain of FGFR4 (**Fig. 5c**) match the design  
383 models with near atomic accuracy, with C $\alpha$  rmds of 0.58 Å for the binder alone and  
384 1.87 Å over the entire complex. The TrkA binder and the FGFR2 binder bind to the



385 curved sheet side of the ligand binding domain of TrkA and FGFR4 with extensive  
386 hydrophobic and polar interactions, and most of the key hydrophobic interactions as  
387 well as the primarily polar interactions in the computational design models are largely  
388 recapitulated in the crystal structures (**Fig 5b,c**). The binding interface partially overlaps  
389 with the native ligand binding sites of nerve growth factor (NGF) and fibroblast growth  
390 factor (FGF), however, the detailed sidechain interactions are entirely different in the  
391 designed and native complexes (**Extended Data Fig. 15a,b**). For IL-7R $\alpha$ , the crystal  
392 structure of the monomer is close to that of the design, with a C $\alpha$  rmsd of 0.63 Å  
393 (**Extended Data Fig. 14b**) and the co-crystal structure with IL-7R $\alpha$  also matches with  
394 the design model closely, with a C $\alpha$  rmsd of 2.2 Å using IL-7R $\alpha$  as the reference (**Fig**  
395 **5d**). Both the de novo IL-7R $\alpha$  binder and the native IL-7 use two helices to bind with IL-  
396 7R $\alpha$ , but the binding orientations are totally different (**Extended Data Fig. 15c**). Further  
397 highlighting the accuracy of the protein interface design method, the cryoEM structures  
398 of the SARS-CoV-2 binders LCB1 and LCB3 in complex with the virus are also nearly  
399 identical to the design models, with C $\alpha$  rmsd of 1.27 Å and 1.9 Å respectively<sup>37</sup> (**Fig. 5e**).  
400 While we were not able yet to solve structures for the remainder of the designs, the high  
401 resolution sequence footprinting (**Fig. 2b, Extended Data Fig. 20 & Extended Data**  
402 **Table 4**) and competition results suggest that the interfaces involve both the designed  
403 residues and the intended regions on the target. The very close agreement between the  
404 experimentally determined structures and the original design models suggests that the  
405 substitutions required to achieve high affinity play relatively subtle roles in tuning  
406 interface energetics; the overall structure of the complex, including the structure of the

407 monomer binders and the detailed target binding mode, are determined by the  
408 computational design procedure.

### 409 **Determinants of design success**

410 For our de novo design strategy to be successful, we must encode in the ~60  
411 residue designed sequences both information on the folded monomer structures, and  
412 on the target binding interfaces: designs which do not fold to the correct structure, or  
413 which fold to the intended structures but do not bind to the target will fail. To assess the  
414 accuracy with which the monomer structure must be designed, we carried out an  
415 additional calculation and experiment for the IL-7R $\alpha$  target. Large numbers of scaffolds  
416 were superimposed onto 11 interface helical binding motifs identified in the first broad  
417 design search, and sequence design was carried out as described above. There was a  
418 strong correlation between the extent of binding and the RMSD to the binding motif  
419 (**Extended Data Fig. 16**), suggesting that designed backbones must be quite accurate  
420 to achieve binding. To assess the determinants of binding of the designed interfaces,  
421 assuming that the designs fold to the intended monomer structures, we took advantage  
422 of the large data set (810,000 binder designs and 240,000 single mutants) generated in  
423 this study. Across all targets, there was a strong correlation between success rate and  
424 the hydrophobicity of the targeted region (**Extended Data Fig. 17**), and designs  
425 observed experimentally to bind their targets tended to have stronger predicted binding  
426 energy, and larger contact molecular surfaces (**Extended Data Fig. 18**). As found  
427 previously for design of protein stability<sup>10</sup>, iterative design-build-test cycles in which the  
428 design method is updated at each iteration to incorporate feedback from the previous

429 design round should lead to systematic improvement in the design methodology and  
430 success rate.

## 431 **Conclusions**

432 Our success in designing nM affinity binders for 14 target sites demonstrates that  
433 binding proteins can be designed de novo using only information on the structure of the  
434 target protein, without need for prior information on binding hotspots or fragments from  
435 structures of complexes with binding partners. The success also suggests that our  
436 design pipeline provides a quite general solution to the de novo protein interface design  
437 problem that goes far beyond previously described methods. However, there is still  
438 considerable room for improvement. Only a small fraction of designs bind, and in  
439 almost all cases, the best of these require a few additional substitutions to achieve high  
440 affinity binding (**Extended Data Table 2**). Furthermore, the design of binders to highly  
441 polar target sites remains a considerable challenge-the sites targeted here all contain at  
442 least four hydrophobic residues. The datasets generated in this work -- both the  
443 information on binders versus non binders, and the feedback on the effects of individual  
444 point mutants on binding -- should help guide the development of methods for designing  
445 high affinity binders directly from the computer with no need for iterative experimental  
446 optimization. More generally, the de novo binder design method and the large data set  
447 generated here provide a starting point for investigating the fundamental physical  
448 chemistry of protein-protein interactions, and for developing and assessing  
449 computational models of protein-protein interactions.

450 This work is a major step forward towards the longer range goal of direct  
451 computational design of high affinity binders starting from structural information alone.

452 We expect the binders created here, and new ones created with the method moving  
453 forward, will find wide utility as signaling pathway antagonists as monomeric proteins  
454 and as tunable agonists when rigidly scaffolded in multimeric formats, and in  
455 diagnostics and therapeutics for pathogenic disease. Unlike antibodies, the designed  
456 proteins can be expressed solubly in *E. coli* at high levels and are thermostable, and  
457 hence could form the basis for a next generation of lower cost protein therapeutics.  
458 More generally, the ability to rapidly and robustly design high affinity binders to arbitrary  
459 protein targets could transform the many areas of biotechnology and medicine that rely  
460 on affinity reagents.

## 461 **Acknowledgements**

462 This work was supported by DARPA Synergistic Discovery and Design (SD2)  
463 HR0011835403 contract FA8750-17-C-0219 (L.C., B.C., S.H., D.B.), The Audacious  
464 Project at the Institute for Protein Design (L.K), the Open Philanthropy Project Improving  
465 Protein Design Fund (B.C., D.B.), funding from Eric and Wendy Schmidt by  
466 recommendation of the Schmidt Futures program (I.G., L.M.), an Azure computing  
467 resource gift for COVID-19 research provided by Microsoft (L.C., B.C.), the National  
468 Institute of Allergy and Infectious Diseases (HHSN272201700059C, D.B., B.H., L.S.;  
469 NIH R01 AI140245 to E.M.S.; NIH R01 AI150855 to I.A.W.), the National Institute on  
470 Aging (R01AG063845, B.H., D.B.), the Defense Threat Reduction Agency (HDTRA1-  
471 16-C-0029, D.B. E-M.S.), The Donald and Jo Anne Petersen Endowment for  
472 Accelerating Advancements in Alzheimer's Disease Research (N.B.), a gift from Gates  
473 Ventures (M.D.), The Human Frontier Science Program (A.Y.) and The Howard Hughes

474 Medical Research Institute (K.M.J, K.C.G., D.B.). Use of SSRL at Stanford Linear  
475 Accelerator Center (SLAC) National Accelerator Laboratory is supported by the US  
476 Department of Energy Office of Science, Office of Basic Energy Sciences under  
477 contract DE-AC02-76SF00515. The SSRL Structural Molecular Biology Program is  
478 supported by the Department of Energy, Office of Biological and Environmental  
479 Research and the National Institutes of Health, National Institute of General Medical  
480 Sciences (including P41GM103393). A part of this work is based upon research  
481 conducted at the Northeastern Collaborative Access Team beamlines, which are funded  
482 by the National Institute of General Medical Sciences from the National Institutes of  
483 Health (P30 GM124165). The Eiger 16M detector on the 24-ID-E beam line is funded by  
484 a NIH-ORIP HEI grant (S10OD021527). STRW was supported by the CCR intramural  
485 research program of NCI-NIH. GM/CA at the Advanced Photon Source at Argonne  
486 National Laboratory has been funded by the National Cancer Institute (ACB-12002) and  
487 the National Institute of General Medical Sciences (AGM-12006, P30GM138396). This  
488 research used resources of the Advanced Photon Source, a U.S. Department of Energy  
489 (DOE) Office of Science User Facility operated for the DOE Office of Science by  
490 Argonne National Laboratory under Contract No. DE-AC02-06CH11357. The Eiger  
491 16M detector at GM/CA-XSD was funded by NIH grant S10 OD012289. We thank the  
492 staff of beamline ID23-2 (ESRF) for technical support and beamtime allocation. S.N.S.  
493 acknowledges research support from Research Foundation Flanders (grants  
494 G0C2214N and G0E1516N), and the Hercules Foundation (no. AUGE- 11-029). S.N.S.  
495 is a principal investigator of the VIB (Belgium).  
496

497 We thank George Ueda for kindly providing the Ang1 protein for the TrkA competition  
498 assay and Deborah H. Fuller for kindly providing the FI6v3 antibody for the HA  
499 competition assay. We thank Yong-Jun Park, Alexandra Walls, and David Veessler for  
500 their collaborative research and cryoEM structure determination for minibinders  
501 targeting SARS-CoV-2 Spike. We would also like to thank Kandise Van Wormer and  
502 Austin Curtis Smith for their tremendous laboratory support during COVID-19.

503 **Competing interests:**

504 L. C., B.C., I.G., B.H., E-M.S., L.S. and D.B. are coinventors on a provisional patent  
505 application that incorporates discoveries described in this manuscript.

506

507

508

509 **Figures**

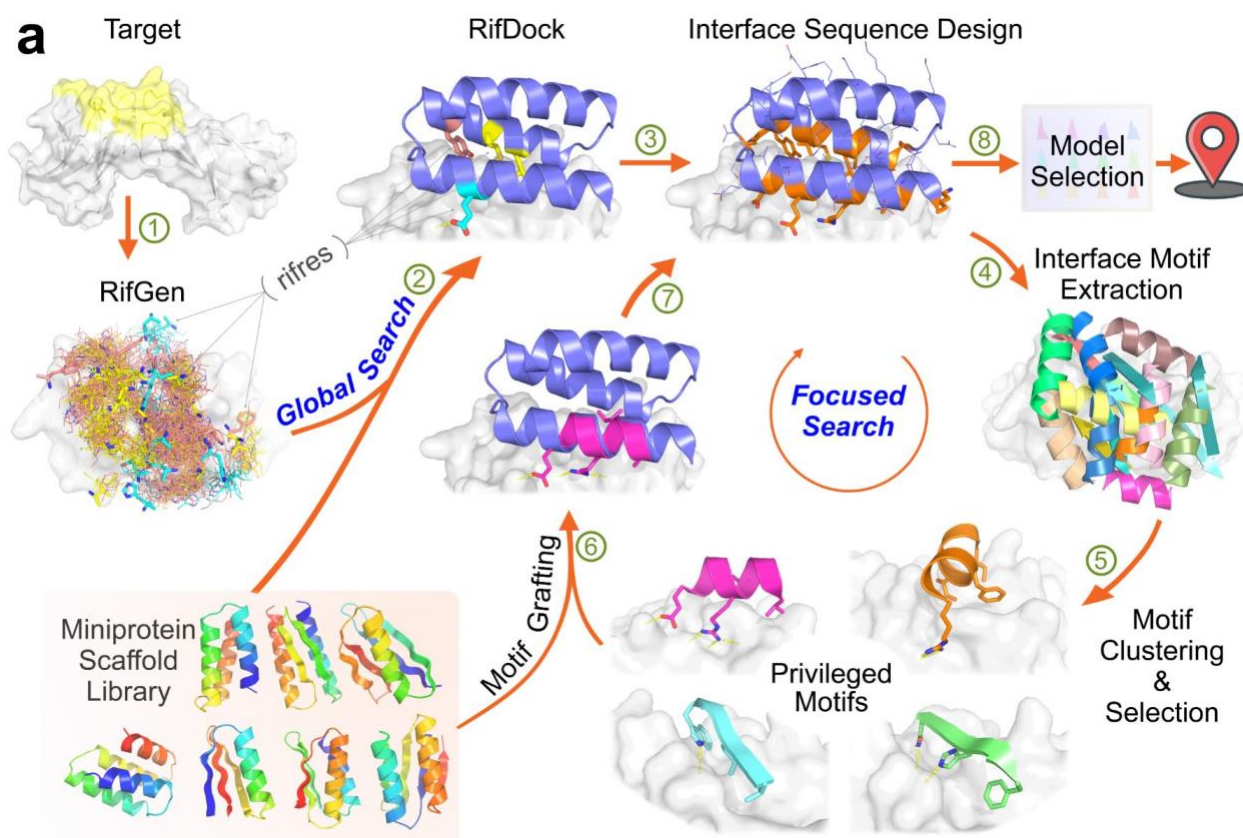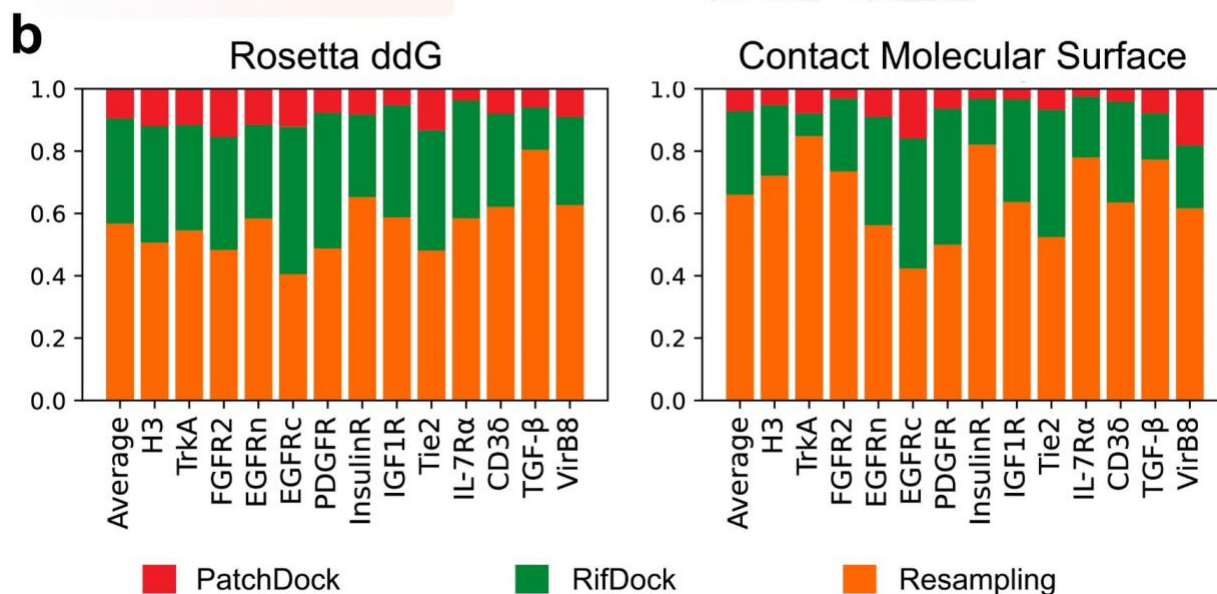

510

511

512 **Figure 1: Overview of the de novo protein binder design pipeline. a**, Schematic of  
513 our two stage binder design approach. In the global search stage, billions of  
514 disembodied amino acids are docked onto the selected targeting region and the  
515 positioning of the scaffolds is guided by the favorable sidechain interactions. The  
516 interface sequences are then designed to maximize interaction with the target. In the  
517 focused search stage, the interface motifs are extracted, clustered. The privileged  
518 motifs are then selected to guide another round of docking and design. Designs are  
519 then selected for experimental characterization based on computational metrics. **b**,  
520 Comparison of sampling efficiency of PatchDock, RifDock, and resampling protocols.  
521 Bar graph shows the distribution over the three approaches of the top 1% of binders  
522 based on Rosetta ddg and contact molecular surface after pooling equal-CPU-time  
523 dock-and-design trajectories for each of the 13 target sites and averaging per-target  
524 distributions (see Methods).

525

526



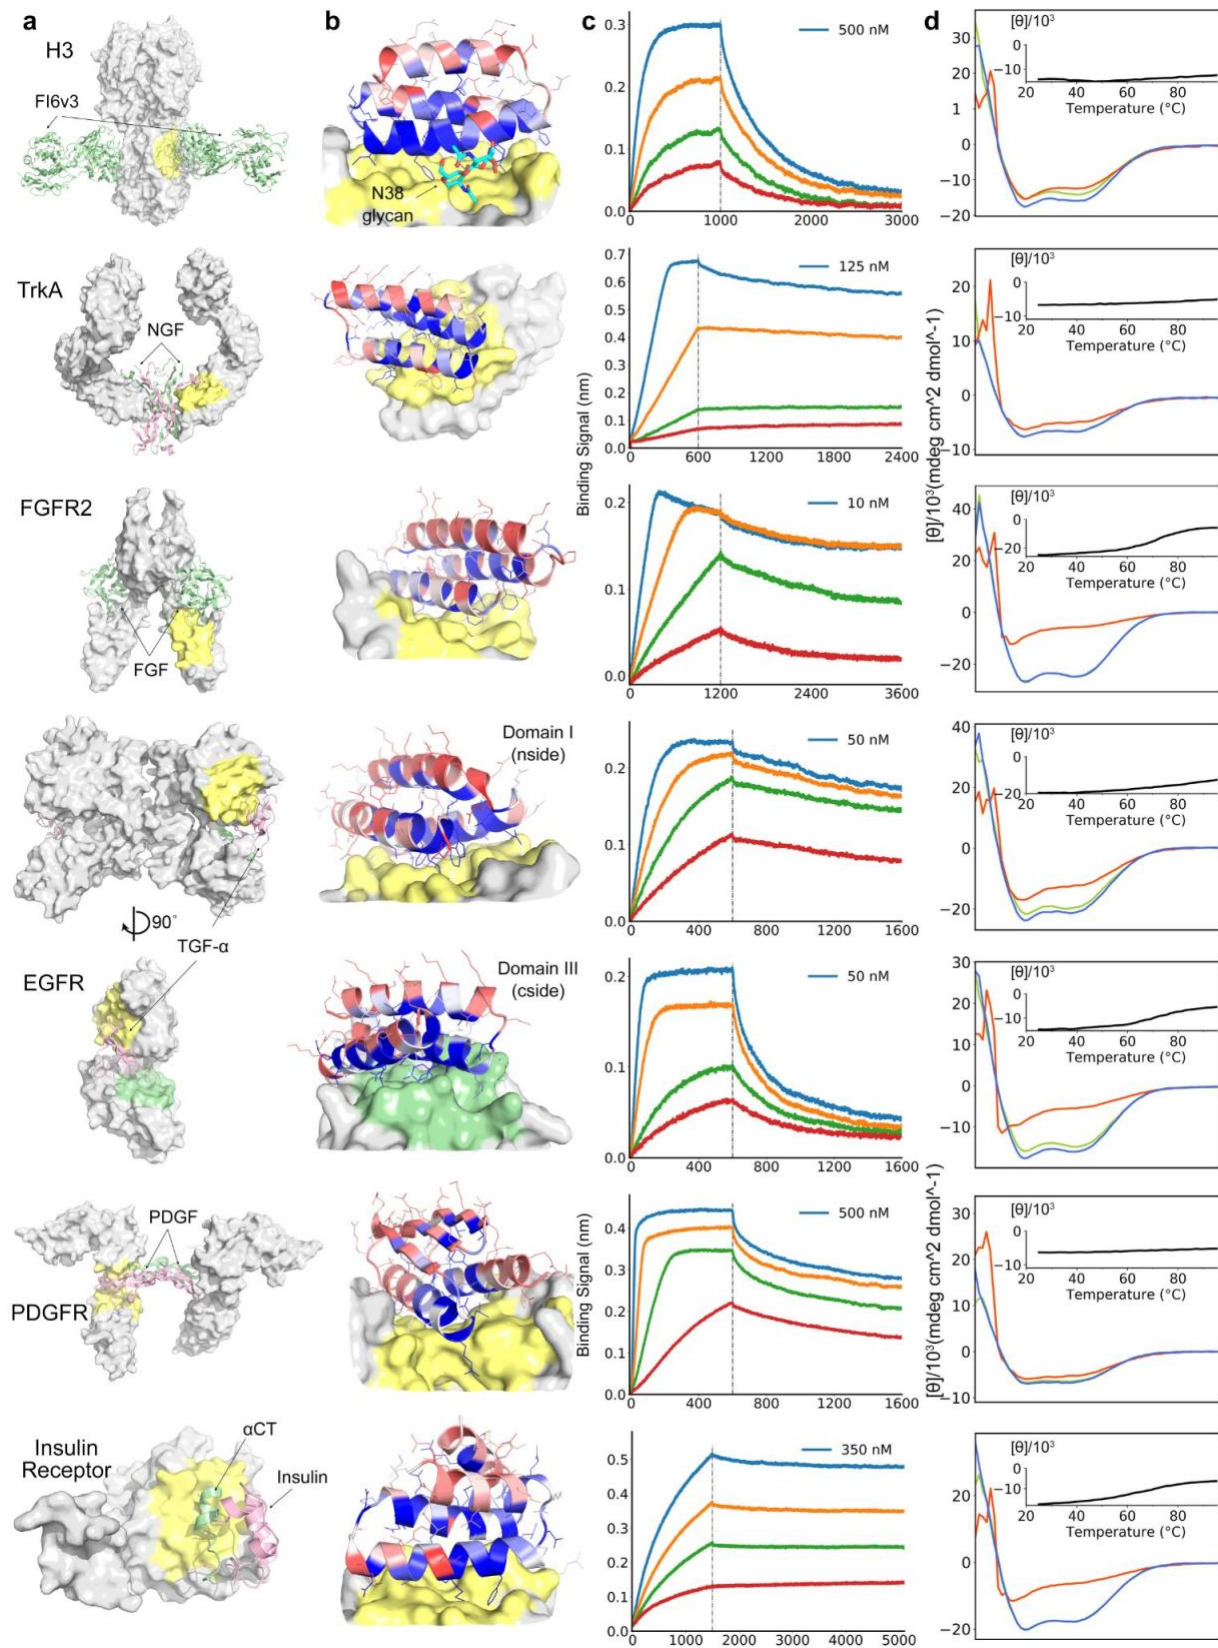

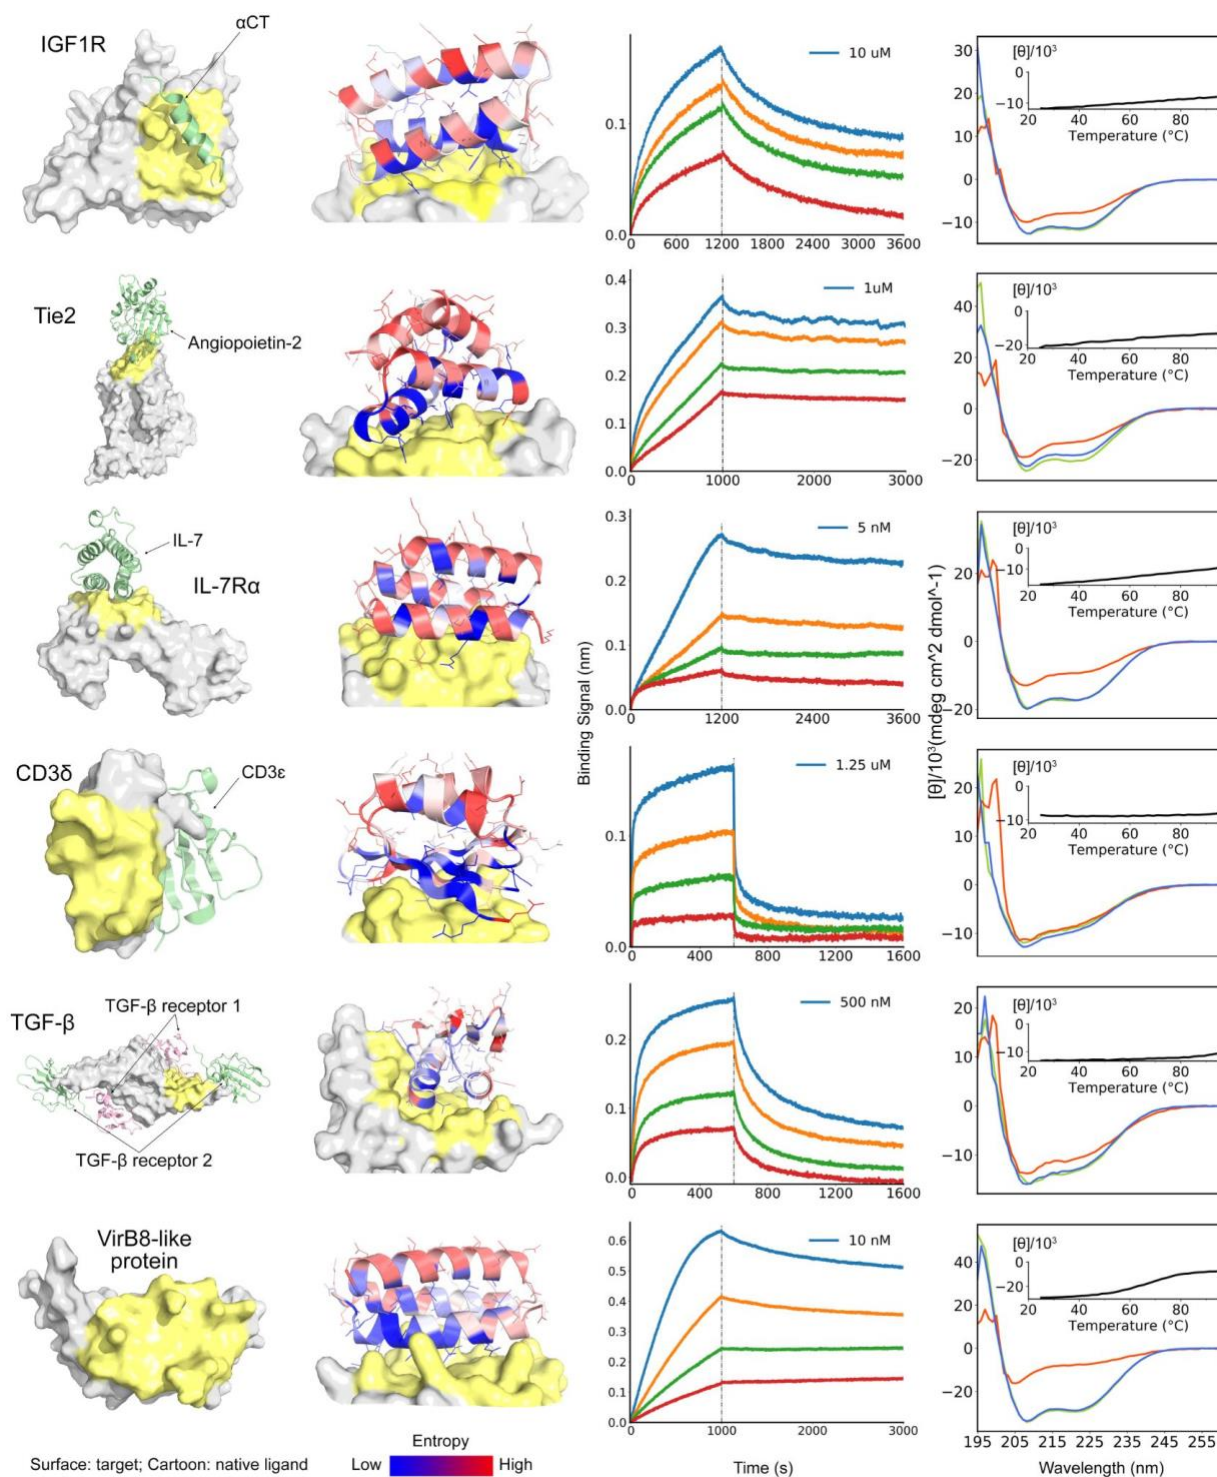

528

529 **Figure 2: De novo design of miniprotein binders to 13 target sites.** a, Naturally  
 530 occurring target protein structures shown in surface representation, with known  
 531 interacting partners in cartoons where available. Regions targeted for binder design or  
 532 in pale yellow or green; the remainder of the target surface is in grey. See (**Extended**

533 **Data Figure 4)** for the zoomed in views of the selected targeting regions. The PDB ID  
534 codes are 3ZTJ (H3), 2IFG (TrkA), 1DJS (FGFR2), 1MOX (EGFR), 3MJG (PDGFR),  
535 4OGA (InsulinR), 5U8R (IGF1R), 2GY7 (Tie2), 3DI3 (IL-7R $\alpha$ ), 1XIW (CD3 $\delta$ ), 3KFD  
536 (TGF- $\beta$ ) and 4O3V (VirB8). **b**, Computational models of designed complexes colored  
537 by site saturation mutagenesis results. Designed binding proteins (cartoons) are colored  
538 by positional Shannon entropy, with blue indicating positions of low entropy (conserved)  
539 and red those of high entropy (not conserved); target surface is in grey and yellow. The  
540 core residues and binding interface residues are more conserved than the non-interface  
541 surface positions, consistent with the computational models. Full SSM maps over all  
542 positions of all the de novo designs are provided in (**Supplementary file/Extended**  
543 **Data Fig. 18**). **c**, Biolayer interferometry characterization of binding of optimized  
544 designs to the corresponding targets. Two-fold serial dilutions were tested for each  
545 binder and the highest concentration is labeled. For H3, TrkA, FGFR2, EGFR, PDGFR,  
546 IL-7R $\alpha$ , CD3 $\delta$ , TGF- $\beta$  and VirB8, the biotinylated target proteins were loaded onto the  
547 Streptavidin (SA) biosensors, and incubated with miniprotein binders in solution to  
548 measure association and dissociation. For IGF1R and Tie2, MBP- (maltose binding  
549 protein) tagged miniprotein binders were used as the analytes. For InsulinR, the  
550 miniprotein binder was immobilized onto the Amine Reactive Second-Generation  
551 (AR2G) Biosensors and the insulin receptor was used as the analyte. **d**, Circular  
552 dichroism spectra at different temperatures (green: 25 °C, red: 95 °C, blue: 95 °C  
553 followed by 25 °C) and (insert) CD signal at 222-nm wavelength as a function of  
554 temperature for the optimized designs.

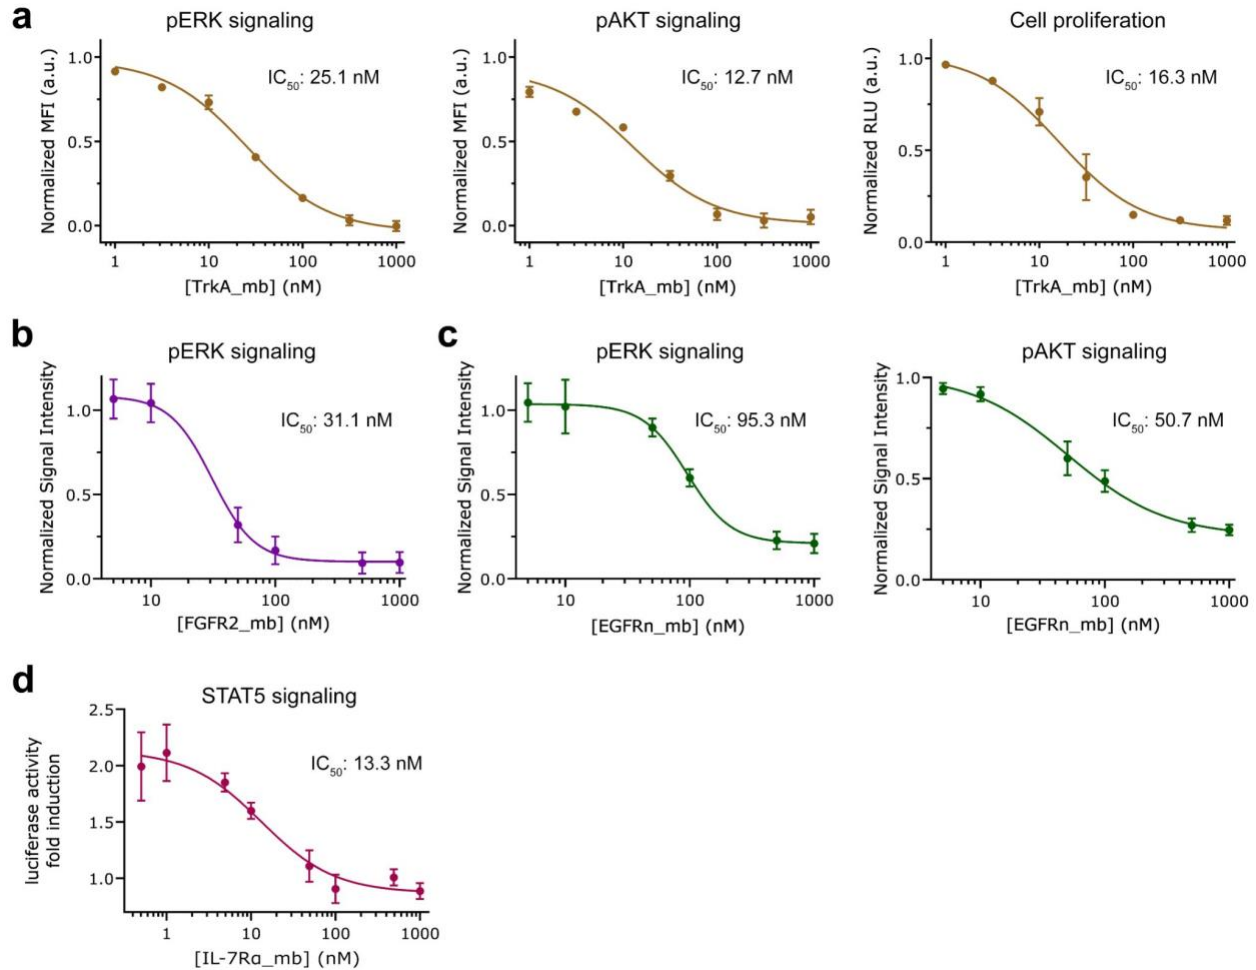

555

556

557 **Figure 3: Inhibition of native signaling pathways by designed miniproteins. a,**  
558 Dose-dependent reduction in (left) pERK signaling, (middle) pAKT signaling and cell  
559 proliferation after 48 hrs (right) of TF-1 cells with increase in TrkA minibinder  
560 concentration. 8.0 ng/ml human beta-NGF was used for competition. Titration curves at  
561 different concentrations of NGF and the effects of the miniprotein binders on cell viability  
562 are in **Extended Data Fig. 9**. **b,** Dose-dependent reduction pERK signaling elicited by  
563 0.75 nM bFGF in HUVECs with increasing FGFR2 minibinder concentration. **c,** Dose-  
564 dependent reduction in (left) pERK signaling, and (right) pAKT signaling elicited by 1nM  
565 EGF in HUVECs with increase in EGFR n-side minibinder concentration. See **Extended**  
566 **Data Fig. 10** and methods for the experimental details. **d,** Reduction in STAT5 activity  
567 induced by 50 pM of hIL-7 in HEK293T cells in the presence of increased hIL-7Ra  
568 minibinder concentrations.  $IC_{50}$  was calculated using a four-parameter-logistic

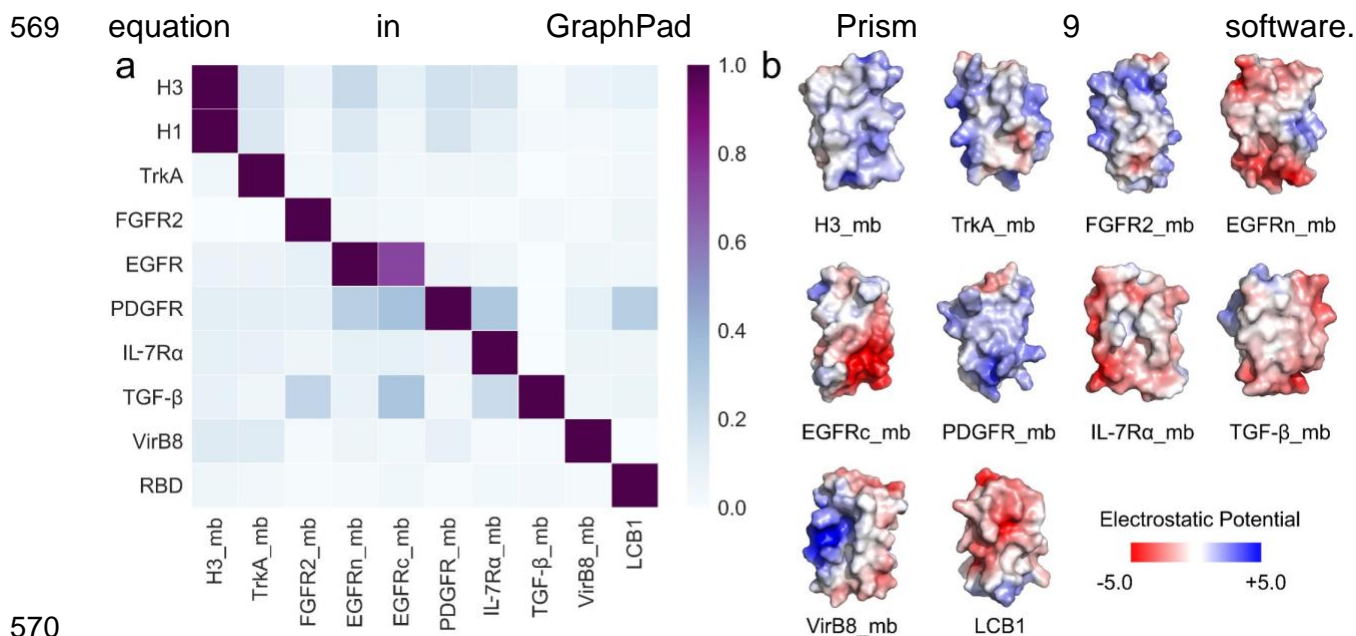

571 **Figure 4: Designed binders have high target specificity.** To assess the cross  
 572 reactivity of each miniprotein binder with each target protein, The biotinylated target  
 573 proteins were loaded onto biolayer interferometry SA sensors, allowed to equilibrate,  
 574 and baseline signal set to zero. The BLI tips were then placed into 100 nM binder  
 575 solution for 300 seconds, washed with buffer, and dissociation was monitored for an  
 576 additional 600 seconds. Heatmap shows the maximum response signal for each binder-  
 577 target pair normalized by the maximum response signal of the cognate designed binder-  
 578 target pair. **b**, Surface shape and electrostatic potential (generated with the APBS  
 579 Electrostatics plugin in Pymol; red positive, blue, negative) of the designed binding  
 580 interfaces.

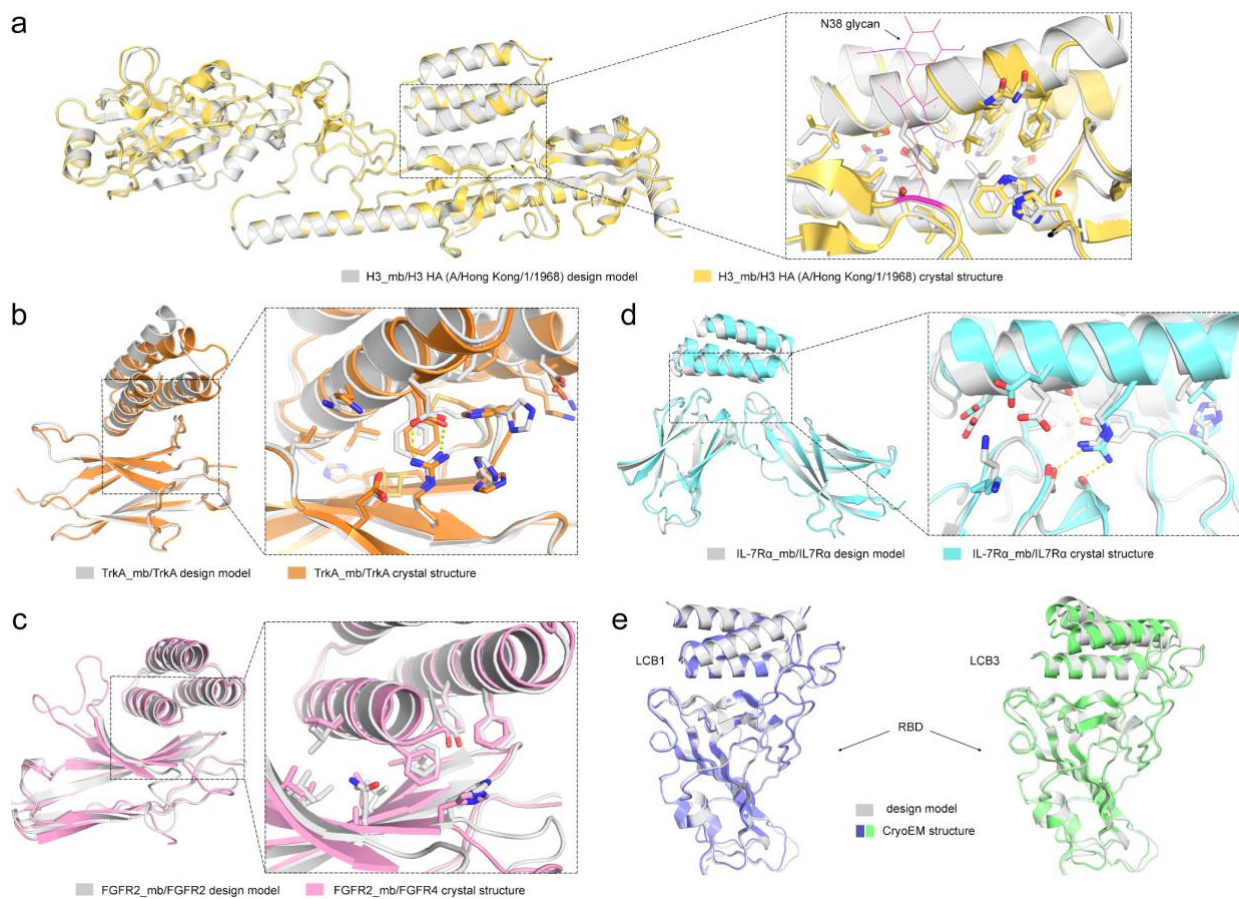

581

582 **Figure 5: High-resolution structures of miniprotein binders in complex with target**  
583 **proteins are very close to computational design models. (a-d).** (left)  
584 Superimposition of computational design model (silver) on experimentally determined  
585 crystal structure. (right) Zoom-in view of designed interface, with interacting side chains  
586 as sticks. **a.** H3, **b.** TrkA, **c.** FGFR2, **d.** IL-7R $\alpha$ . **e.** Superimposition of the computational  
587 design model and refined cryo-EM structures of LCB1 (left) and LCB3 (right) bound to  
588 receptor binding domain of SARS-CoV-2 spike protein (design models are in gray and  
589 cryoEM structures are in pale blue and green).

590

591

592

593

## 594 Reference

- 595 1 Chevalier, A. *et al.* Massively parallel de novo protein design for targeted  
596 therapeutics. *Nature* **550**, 74-79, doi:10.1038/nature23912 (2017).
- 597 2 Strauch, E. M. *et al.* Computational design of trimeric influenza-neutralizing  
598 proteins targeting the hemagglutinin receptor binding site. *Nature biotechnology*  
599 **35**, 667-671, doi:10.1038/nbt.3907 (2017).
- 600 3 Silva, D. A. *et al.* De novo design of potent and selective mimics of IL-2 and IL-15.  
601 *Nature* **565**, 186-191, doi:10.1038/s41586-018-0830-7 (2019).
- 602 4 Baran, D. *et al.* Principles for computational design of binding antibodies.  
603 *Proceedings of the National Academy of Sciences of the United States of*  
604 *America* **114**, 10900-10905, doi:10.1073/pnas.1707171114 (2017).
- 605 5 Fleishman, S. J. *et al.* Computational design of proteins targeting the conserved  
606 stem region of influenza hemagglutinin. *Science* **332**, 816-821,  
607 doi:10.1126/science.1202617 (2011).
- 608 6 Dou, J. *et al.* De novo design of a fluorescence-activating beta-barrel. *Nature* **561**,  
609 485-491, doi:10.1038/s41586-018-0509-0 (2018).
- 610 7 Koga, N. *et al.* Principles for designing ideal protein structures. *Nature* **491**, 222-  
611 227, doi:10.1038/nature11600 (2012).
- 612 8 Linsky, T. *et al.* Sampling of Structure and Sequence Space of Small Protein  
613 Folds. *bioRxiv* (2021).
- 614 9 Maguire, J. B. *et al.* Perturbing the energy landscape for improved packing during  
615 computational protein design. *Proteins* **89**, 436-449, doi:10.1002/prot.26030  
616 (2021).
- 617 10 Rocklin, G. J. *et al.* Global analysis of protein folding using massively parallel  
618 design, synthesis, and testing. *Science* **357**, 168-175,  
619 doi:10.1126/science.aan0693 (2017).
- 620 11 Schneidman-Duhovny, D., Inbar, Y., Nussinov, R. & Wolfson, H. J. PatchDock  
621 and SymmDock: servers for rigid and symmetric docking. *Nucleic acids research*  
622 **33**, W363-367, doi:10.1093/nar/gki481 (2005).
- 623 12 Brunette, T. J. *et al.* Modular repeat protein sculpting using rigid helical junctions.  
624 *Proceedings of the National Academy of Sciences of the United States of*  
625 *America* **117**, 8870-8875, doi:10.1073/pnas.1908768117 (2020).
- 626 13 Coventry, B. & Baker, D. Protein sequence optimization with a pairwise  
627 decomposable penalty for buried unsatisfied hydrogen bonds. *PLoS*  
628 *computational biology* **17**, e1008061, doi:10.1371/journal.pcbi.1008061 (2021).
- 629 14 Wiesmann, C., Ultsch, M. H., Bass, S. H. & de Vos, A. M. Crystal structure of  
630 nerve growth factor in complex with the ligand-binding domain of the TrkA  
631 receptor. *Nature* **401**, 184-188, doi:10.1038/43705 (1999).
- 632 15 Plotnikov, A. N., Hubbard, S. R., Schlessinger, J. & Mohammadi, M. Crystal  
633 structures of two FGF-FGFR complexes reveal the determinants of ligand-  
634 receptor specificity. *Cell* **101**, 413-424, doi:10.1016/s0092-8674(00)80851-x  
635 (2000).
- 636 16 Garrett, T. P. *et al.* Crystal structure of a truncated epidermal growth factor  
637 receptor extracellular domain bound to transforming growth factor alpha. *Cell* **110**,  
638 763-773, doi:10.1016/s0092-8674(02)00940-6 (2002).

- 639 17 Shim, A. H. *et al.* Structures of a platelet-derived growth factor/propeptide  
640 complex and a platelet-derived growth factor/receptor complex. *Proceedings of*  
641 *the National Academy of Sciences of the United States of America* **107**, 11307-  
642 11312, doi:10.1073/pnas.1000806107 (2010).
- 643 18 Croll, T. I. *et al.* Higher-Resolution Structure of the Human Insulin Receptor  
644 Ectodomain: Multi-Modal Inclusion of the Insert Domain. *Structure* **24**, 469-476,  
645 doi:10.1016/j.str.2015.12.014 (2016).
- 646 19 Xu, Y. *et al.* How ligand binds to the type 1 insulin-like growth factor receptor.  
647 *Nature communications* **9**, 821, doi:10.1038/s41467-018-03219-7 (2018).
- 648 20 Barton, W. A. *et al.* Crystal structures of the Tie2 receptor ectodomain and the  
649 angiopoietin-2-Tie2 complex. *Nature structural & molecular biology* **13**, 524-532,  
650 doi:10.1038/nsmb1101 (2006).
- 651 21 McElroy, C. A., Dohm, J. A. & Walsh, S. T. Structural and biophysical studies of  
652 the human IL-7/IL-7Ralpha complex. *Structure* **17**, 54-65,  
653 doi:10.1016/j.str.2008.10.019 (2009).
- 654 22 Arnett, K. L., Harrison, S. C. & Wiley, D. C. Crystal structure of a human CD3-  
655 epsilon/delta dimer in complex with a UCHT1 single-chain antibody fragment.  
656 *Proceedings of the National Academy of Sciences of the United States of*  
657 *America* **101**, 16268-16273, doi:10.1073/pnas.0407359101 (2004).
- 658 23 Radaev, S. *et al.* Ternary complex of transforming growth factor-beta1 reveals  
659 isoform-specific ligand recognition and receptor recruitment in the superfamily.  
660 *The Journal of biological chemistry* **285**, 14806-14814,  
661 doi:10.1074/jbc.M109.079921 (2010).
- 662 24 Ekiert, D. C. *et al.* Cross-neutralization of influenza A viruses mediated by a  
663 single antibody loop. *Nature* **489**, 526-532, doi:10.1038/nature11414 (2012).
- 664 25 Gillespie, J. J. *et al.* Structural Insight into How Bacteria Prevent Interference  
665 between Multiple Divergent Type IV Secretion Systems. *mBio* **6**, e01867-01815,  
666 doi:10.1128/mBio.01867-15 (2015).
- 667 26 Birtalan, S. *et al.* The intrinsic contributions of tyrosine, serine, glycine and  
668 arginine to the affinity and specificity of antibodies. *Journal of molecular biology*  
669 **377**, 1518-1528, doi:10.1016/j.jmb.2008.01.093 (2008).
- 670 27 Lemmon, M. A. & Schlessinger, J. Cell signaling by receptor tyrosine kinases.  
671 *Cell* **141**, 1117-1134, doi:10.1016/j.cell.2010.06.011 (2010).
- 672 28 Markovic, I. & Savvides, S. N. Modulation of Signaling Mediated by TSLP and IL-  
673 7 in Inflammation, Autoimmune Diseases, and Cancer. *Frontiers in immunology*  
674 **11**, 1557, doi:10.3389/fimmu.2020.01557 (2020).
- 675 29 Webster, R. G., Bean, W. J., Gorman, O. T., Chambers, T. M. & Kawaoka, Y.  
676 Evolution and ecology of influenza A viruses. *Microbiological reviews* **56**, 152-  
677 179, doi:10.1128/mr.56.1.152-179.1992 (1992).
- 678 30 Nobusawa, E. *et al.* Comparison of complete amino acid sequences and  
679 receptor-binding properties among 13 serotypes of hemagglutinins of influenza A  
680 viruses. *Virology* **182**, 475-485, doi:10.1016/0042-6822(91)90588-3 (1991).
- 681 31 Bullough, P. A., Hughson, F. M., Skehel, J. J. & Wiley, D. C. Structure of  
682 influenza haemagglutinin at the pH of membrane fusion. *Nature* **371**, 37-43,  
683 doi:10.1038/371037a0 (1994).



- 684 32 Ekiert, D. C. *et al.* Antibody recognition of a highly conserved influenza virus  
685 epitope. *Science* **324**, 246-251, doi:10.1126/science.1171491 (2009).
- 686 33 Corti, D. *et al.* A neutralizing antibody selected from plasma cells that binds to  
687 group 1 and group 2 influenza A hemagglutinins. *Science* **333**, 850-856,  
688 doi:10.1126/science.1205669 (2011).
- 689 34 Joyce, M. G. *et al.* Vaccine-Induced Antibodies that Neutralize Group 1 and  
690 Group 2 Influenza A Viruses. *Cell* **166**, 609-623, doi:10.1016/j.cell.2016.06.043  
691 (2016).
- 692 35 Kadam, R. U. *et al.* Potent peptidic fusion inhibitors of influenza virus. *Science*  
693 **358**, 496-502, doi:10.1126/science.aan0516 (2017).
- 694 36 van Dongen, M. J. P. *et al.* A small-molecule fusion inhibitor of influenza virus is  
695 orally active in mice. *Science* **363**, doi:10.1126/science.aar6221 (2019).
- 696 37 Cao, L. *et al.* De novo design of picomolar SARS-CoV-2 miniprotein inhibitors.  
697 *Science* **370**, 426-431, doi:10.1126/science.abd9909 (2020).
- 698 38 Case, J. B. *et al.* Ultrapotent miniproteins targeting the receptor-binding domain  
699 protect against SARS-CoV-2 infection and disease in mice. *bioRxiv* (2021).
- 700 39 Quijano-Rubio, A. *et al.* De novo design of modular and tunable protein  
701 biosensors. *Nature* **591**, 482-487, doi:10.1038/s41586-021-03258-z (2021).
- 702 40 Frejd, F. Y. & Kim, K. T. Affibody molecules as engineered protein drugs.  
703 *Experimental & molecular medicine* **49**, e306, doi:10.1038/emm.2017.35 (2017).
